# Supplementary material
Source: PubMed Central journal article supplement (PMC5109242)

Source data for Figure 1D

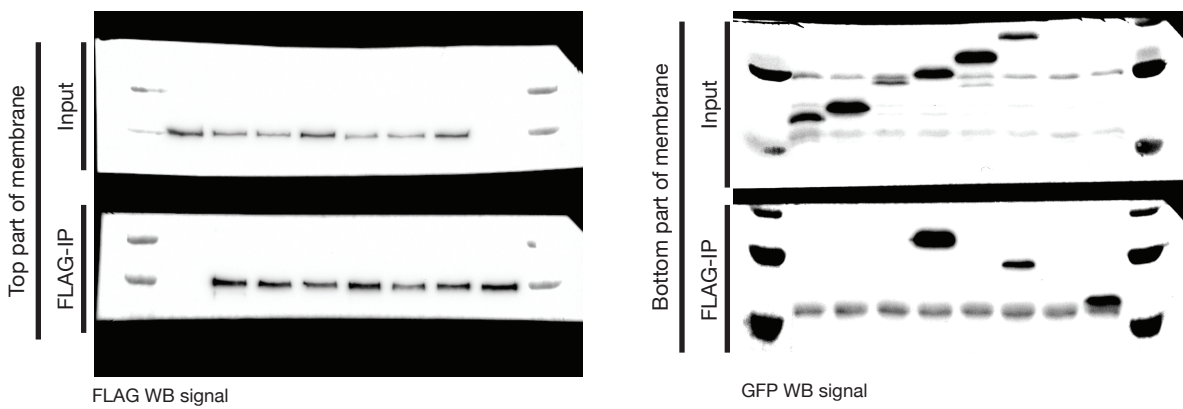

Source data for Figure 1E

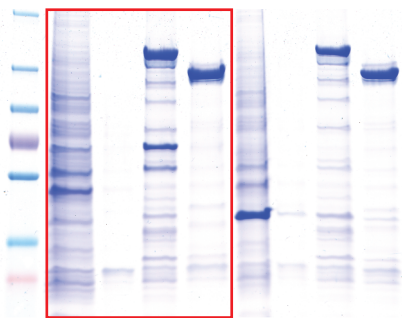

Source data for Figure 1F

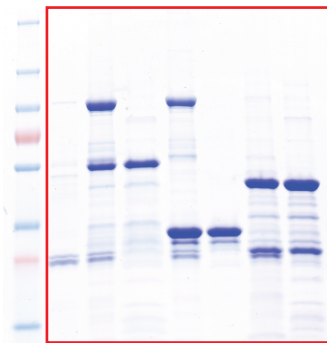

Source data for Figure 1G

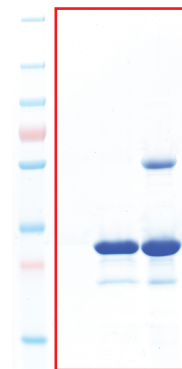

Supplement: EMBJ-35-2417-s004.pdf [file EMBJ-35-2417-s004.pdf]
