# Supplementary material
Source: PubMed Central journal article supplement (PMC5109242)

Source Data for Reimão-Pinto *et al.*, Figure 4 and S2

Source data for Figure 4 A

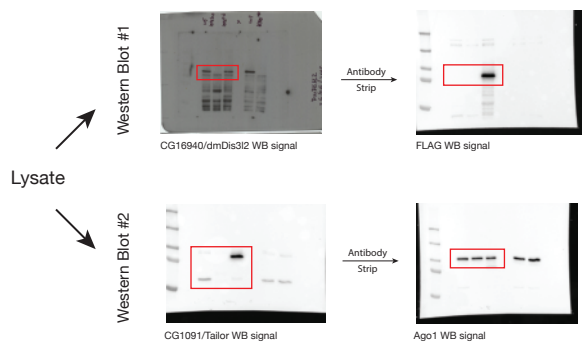

Source data for Figure 4 E

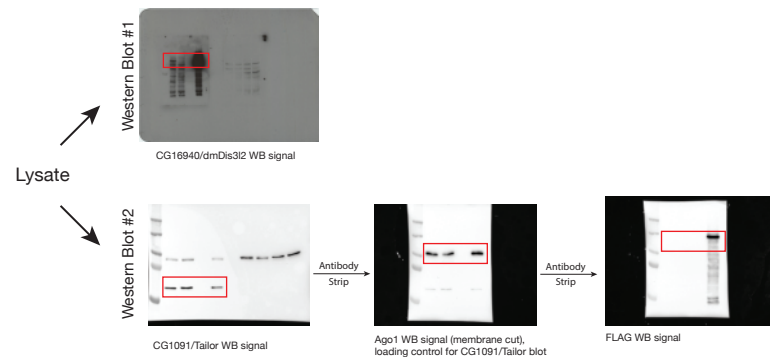

Source data for Figure 4B and C

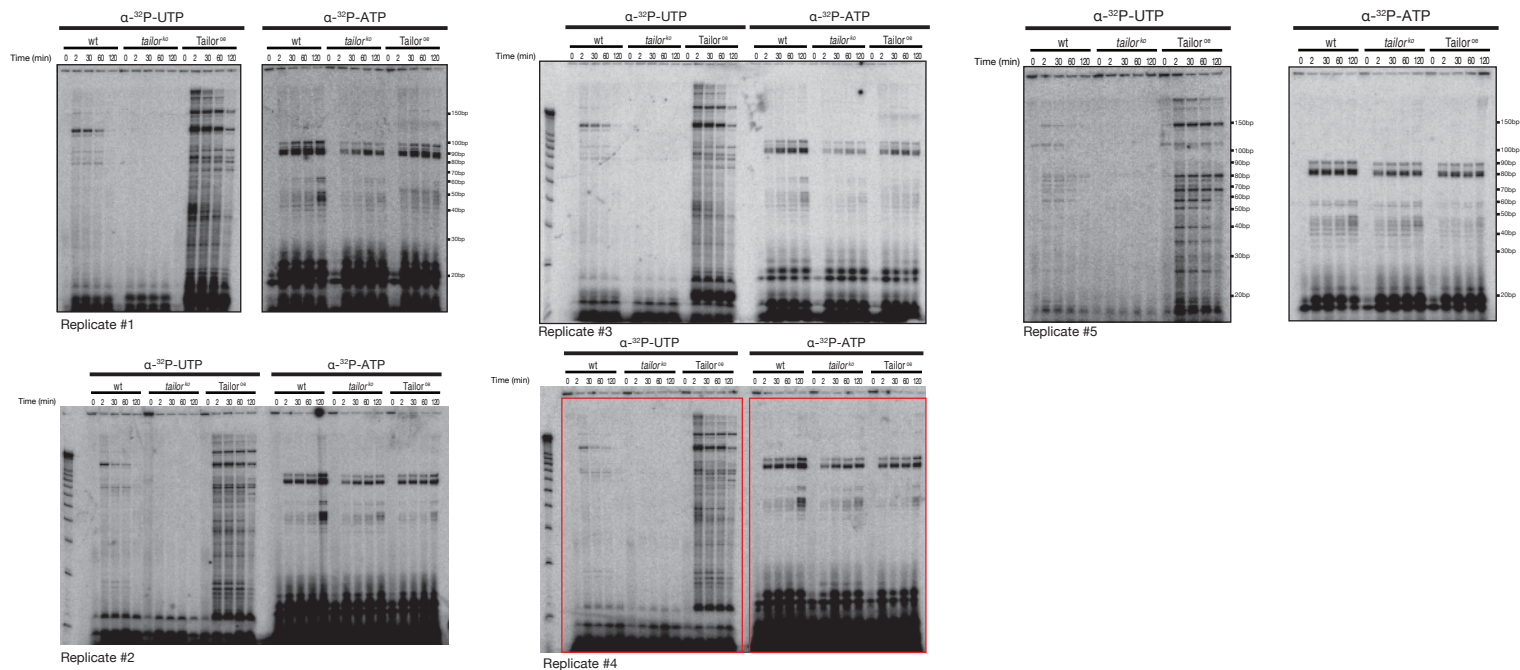

Source data for Figure 4F and G

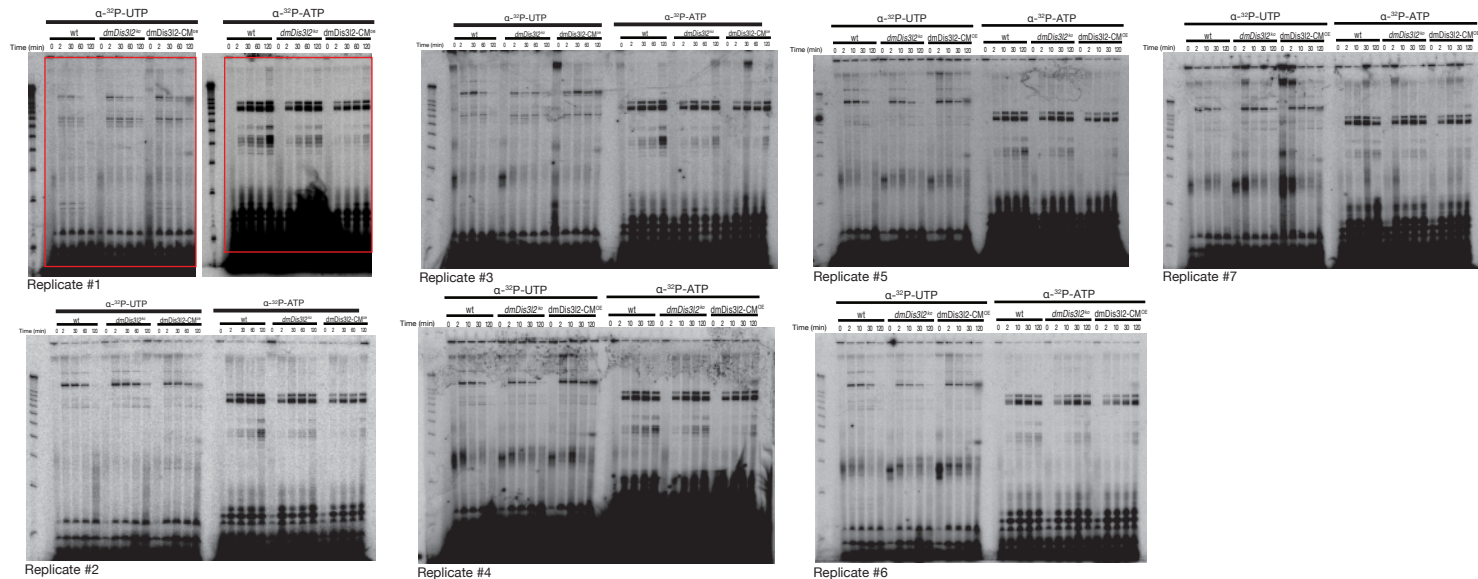

Supplement: EMBJ-35-2417-s007.pdf [file EMBJ-35-2417-s007.pdf]
