# Supplementary material
Source: PubMed Central journal article supplement (PMC5109242)

Source data for Figure 2B

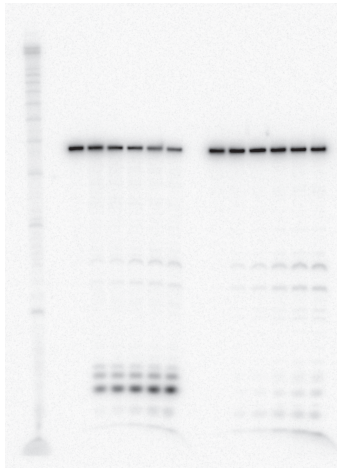

Supplement: EMBJ-35-2417-s005.pdf [file EMBJ-35-2417-s005.pdf]

Source data for Figure 3A and B

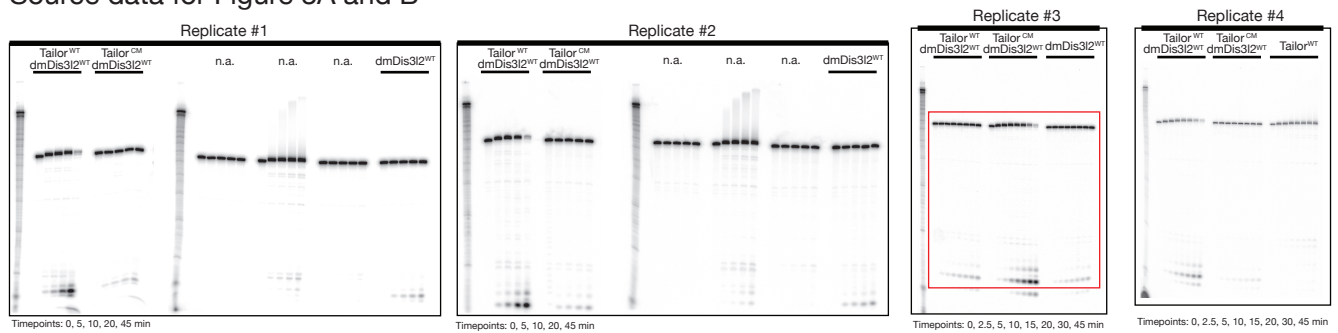

Source data for Figure 3C and D

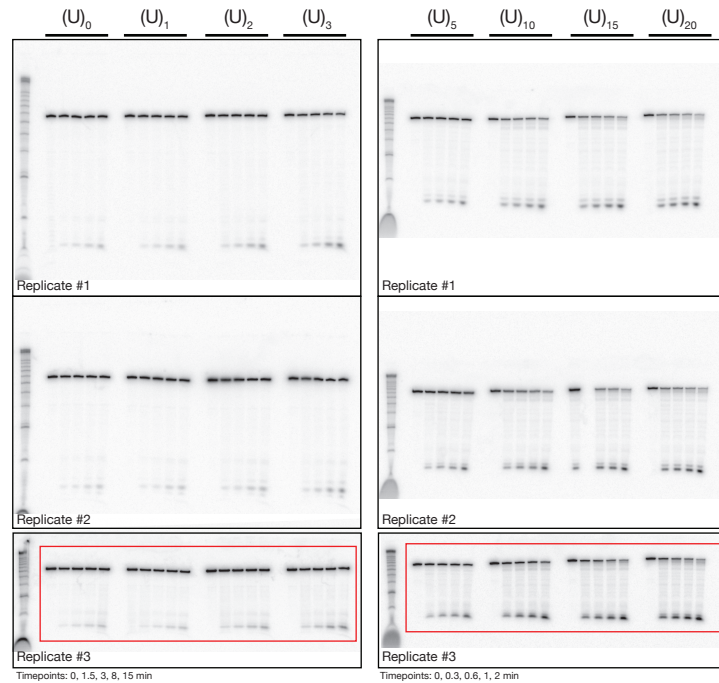

Source data for Figure EV3A and B

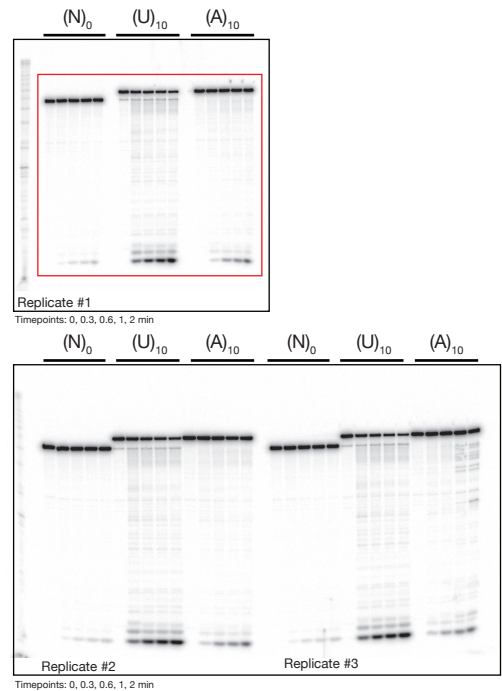

Supplement: EMBJ-35-2417-s006.pdf [file EMBJ-35-2417-s006.pdf]

Source data for Figure 5 A

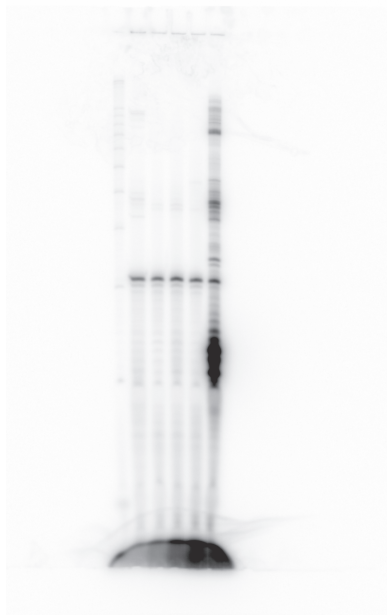

Supplement: EMBJ-35-2417-s008.pdf [file EMBJ-35-2417-s008.pdf]

Source data for Figure 6 C and D

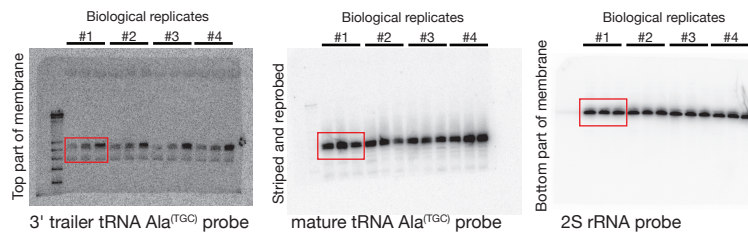

Source data for Figure 6 E and F

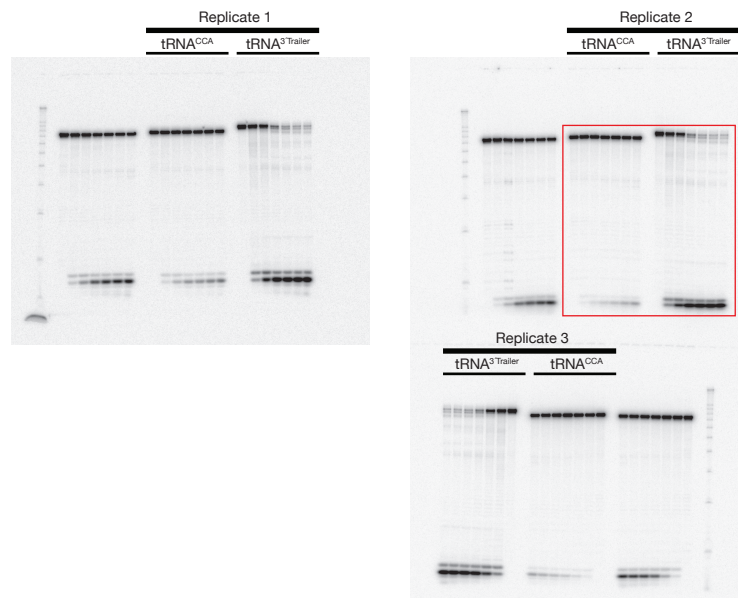

Supplement: EMBJ-35-2417-s009.pdf [file EMBJ-35-2417-s009.pdf]
